# Supplementary material for: Lupus Nephritis and Hydroxychloroquine-Associated Zebra Bodies: Not Just in Fabry Disease
Source: PubMed Central journal article supplement (PMC8178476; doi:10.1016/j.xkme.2021.01.006), 2021-03-18
Supplement: mmc1.pdf [file mmc1.pdf]

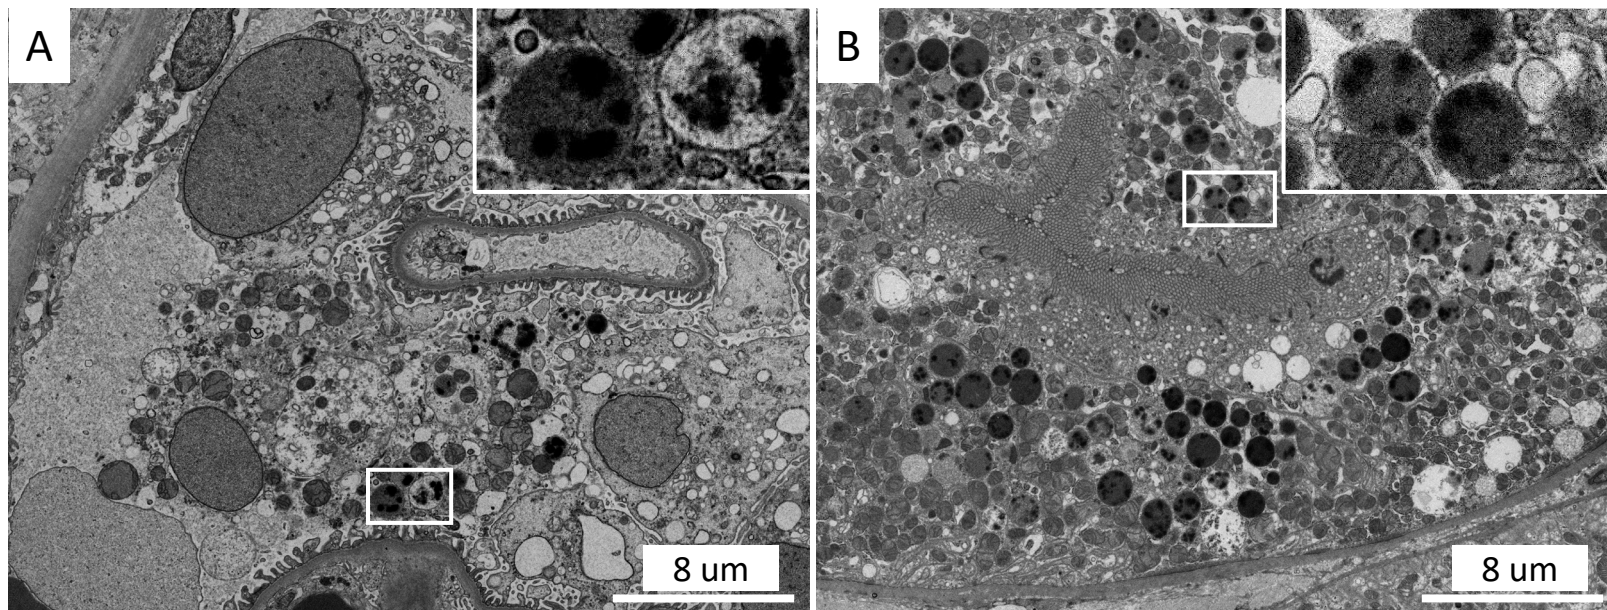

**Supplementary Figure 1. Ultrastructural findings of the kidney biopsy.**

Osmiophilic granules of patient III. (A) Fragmented podocyte with intracellular vesicles including osmiophilic granules (x1,500, inset x6,000). (B) Swollen proximal tubular epithelial cells with intracellular vesicles including osmiophilic granules (x1,500, inset x6,000).

**Supplementary table 1. Clinical characteristics and kidney biopsy findings of previously reported cases.**

| Case | Age Sex | Diagnosis | CQ or HCQ | CQ/HCQ dose (mg/day) | Duration of CQ/HCQ (year) | Indication for KBx       | Urine protein at KBx (g/day) | Serum creatinine at KBx (mg/dL) | GLA activity | GLA activity (normal range) | GLA Mutation | Zebra-like body | Curvilinear body | Treatment                             | Clinical outcome | Year [Ref] |
|------|---------|-----------|-----------|----------------------|---------------------------|--------------------------|------------------------------|---------------------------------|--------------|-----------------------------|--------------|-----------------|------------------|---------------------------------------|------------------|------------|
| 1    | 46 F    | SiS       | CQ        | 155                  | 0.9                       | kidney dysfunction       | 1.0                          | 5.0                             | 56           | 33.2-109                    | ND           | +               | +                | CQ suspension                         | improved         | 2003 [8]   |
| 2    | 56 F    | RA        | CQ        | 500                  | 1.5                       | kidney dysfunction       | trace                        | 2.2                             | 33.2         | 8.8-42.6                    | none         | +               | +                | CQ and NSAIDs suspension              | unchanged        | 2005 [9]   |
| 3    | 56 F    | arteritis | HCQ       | ND                   | 10                        | proteinuria              | 3.3                          | ND                              | normal       |                             | none         | +               | -                | HCQ suspension<br>ACEI                | unchanged        | 2006 [10]  |
| 4    | 70 F    | SLE       | HCQ       | ND                   | 8                         | proteinuria              | 2                            | ND                              | normal       |                             | none         | +               | -                | HCQ suspension                        | unchanged        | 2007 [11]  |
| 5    | 31 F    | SLE       | HCQ       | 150                  | 3                         | initiation for belimumab | 0.6                          | ND                              | 8.18         | 2.1-13.6                    | none         | +               | +                | HCQ suspension                        | unchanged        | 2013 [12]  |
| 6    | 28 F    | SLE       | HCQ       | 400                  | 1.2                       | proteinuria              | 0.6                          | ND                              | ND           |                             | ND           | +               | -                | HCQ suspension<br>Thalidomide<br>ACEI | improved         | 2017 [13]  |
| 7    | 26 F    | SLE       | HCQ       | ND                   | 9                         | nephrotic syndrome       | 6.9                          | ND                              | normal       |                             | none         | +               | -                | HCQ suspension<br>IVCY                | Improved         | 2017 [14]  |
| 8    | 27 F    | SLE       | HCQ       | ND                   | 15                        | proteinuria              | 0.4-3.8                      | ND                              | ND           |                             | none         | +               | -                | ND                                    | ND               | 2018 [15]  |

CQ; chloroquine, HCQ; hydroxychloroquine, KBx; kidney biopsy, GLA; alpha-galactosidase, Ref; Number of reference, F; female, SjS; Sjogren's syndrome, RA; rheumatoid arthritis, SLE; systemic lupus erythematosus, ND; not documented, NSAIDs; nonsteroidal anti-inflammatory drugs, ACEI; angiotensin converting enzyme inhibitor, IVCY; intravenous cyclophosphamide,

**Supplementary table 2. Clinical characteristics, kidney biopsy findings and assessment for Fabry disease of the present cases.**

| Case | Age Sex | Diagnosis     | CQ or HCQ | CQ/HCQ dose (mg/day) | Duration of CQ/HCQ (year) | Indication for KBx               | Urine protein at KBx (g/day) | Serum creatinine at KBx (mg/dL) | GLA activity | GLA Mutation | Zebra-like body | Curvilinear body | Treatment          | Clinical outcome | Electro-cardiogram | Echo-cardiogram      | Neuro-pathic pain | Cornea verticillata |
|------|---------|---------------|-----------|----------------------|---------------------------|----------------------------------|------------------------------|---------------------------------|--------------|--------------|-----------------|------------------|--------------------|------------------|--------------------|----------------------|-------------------|---------------------|
| I    | 34 F    | SLE           | HCQ       | 300                  | 0.7                       | recurrence of nephritis          | 0.35                         | 0.54                            | NA           | NA           | +               | -                | PSL, MMF, HCQ      | improved         | normal             | NA                   | -                 | -                   |
| II   | 51 F    | SLE           | HCQ       | 300                  | 2.3                       | nephrotic syndrome               | 2.9                          | 0.77                            | NA           | NA           | +               | -                | PSL, MMF, HCQ      | improved         | normal             | IVST 10mm<br>PWT 9mm | -                 | -                   |
| III  | 20 F    | SLE, SjS      | HCQ       | 200                  | 0.3                       | nephritis                        | 1.2                          | 0.49                            | NA           | NA           | +               | -                | PSL, MMF, HCQ      | improved         | normal             | IVST 6mm<br>PWT 6mm  | -                 | -                   |
| IV   | 34 F    | SLE           | HCQ       | 400                  | 4                         | recurrence of nephrotic syndrome | 9.1                          | 0.52                            | NA           | NA           | +               | -                | PSL, MMF, Tac, HCQ | improved         | normal             | NA                   | -                 | -                   |
| V    | 42 F    | SLE, SjS, APS | HCQ       | 300                  | 0.03                      | nephritis                        | 0.45                         | 0.71                            | NA           | NA           | +               | -                | PSL, MMF, HCQ      | improved         | normal             | IVST 9mm<br>PWT 9mm  | -                 | -                   |

CQ; chloroquine, HCQ; hydroxychloroquine, KBx; kidney biopsy, GLA; alpha-galactosidase, F; female, SLE; systemic lupus erythematosus, , NA; not analyzed, ISVT; intraventricular septum thickness, PWT; posterior left ventricular wall thickness, PSL; prednisolone, MMF; mycophenolate mofetil, SjS; Sjogren's syndrome, Tac; tacrolimus, APS; anti-phospholipid syndrome
